1 **ELIMINATION OF EGFR-OVEREXPRESSING CANCER CELLS BY CD32 CHIMERIC**  
2 **RECEPTOR T CELLS IN COMBINATION WITH CETUXIMAB OR PANITUMUMAB**

3 Sara Caratelli<sup>1</sup>, Roberto Arriga<sup>2</sup>, Tommaso Sconocchia<sup>3</sup>, Alessio Ottaviani<sup>1</sup>, Giulia  
4 Lanzilli<sup>1</sup>, Donatella Pastore<sup>2</sup>, Carlo Cenciarelli <sup>1</sup>, Adriano Venditti<sup>4</sup>, Maria Ilaria Del  
5 Principe<sup>4</sup>, Davide Lauro<sup>2</sup>, Elisa Landoni<sup>5</sup>, Hongwei Du<sup>5</sup>, Barbara Savoldo<sup>5</sup>, Soldano  
6 Ferrone<sup>6</sup>, Gianpietro Dotti<sup>5</sup>, Giuseppe Sconocchia<sup>1</sup>

7 <sup>1</sup>Institute of Translational Pharmacology, CNR, Rome, Italy

8 <sup>2</sup>Department of Systems Medicine, University of Rome “Tor Vergata”, Rome, Italy

9 <sup>3</sup>Otto Loewi Research Center, Chair of Immunology and Pathophysiology, Medical  
10 University of Graz, Graz, Austria

11 <sup>4</sup>Hematology, Department of Biomedicine and Prevention, University of Rome “Tor  
12 Vergata”, Rome, Italy

13 <sup>5</sup>Lineberger Comprehensive Cancer Center, University of North Carolina, Chapel Hill, NC,  
14 USA

15 <sup>6</sup>Departments of Surgery, Massachusetts General Hospital, Harvard Medical School,  
16 Boston, MA, USA

17 **Corresponding Author:** Giuseppe Sconocchia, Institute of Translational Pharmacology,  
18 Department of Biomedical Sciences, National Research Council (CNR), Via Fosso del  
19 Cavaliere 100, 00133, Rome, Italy.

20 Phone : +39-06-4993-4486/4487

21 Fax: +39-06-49934257

22 Email: [giuseppe.sconocchia@ift.cnr.it](mailto:giuseppe.sconocchia@ift.cnr.it)

23 **Disclosure of Potential Conflicts of Interest :** The authors declare no potential conflict  
24 of interest.

25 **Keywords:** CAR T cells, panitumumab, cetuximab, EGFR, breast cancer.

26 **Abbreviations:** ADCC: antibody-dependent-cellular-cytotoxicity; APC: allophycocyanin;  
27 BC: breast cancer; CM: complete medium; CR: chimeric receptor; CRC: colorectal  
28 carcinoma; DMEM: Dulbecco's Modified Eagle's Medium; ECCs: EGFR positive epithelial  
29 cancer cells; EGFR: epidermal growth factor receptor; FBS: fetal bovine serum; FcR BR:  
30 Fc receptor blocking reagent; FITC: fluorescein isothiocyanate; IMDM: Iscove's Modified  
31 Dulbecco's Medium; IL-7: interleukin-7; IL-15: interleukin-15; INF $\gamma$ : interferon gamma;  
32 mAb: monoclonal antibody; MFI : mean fluorescence intensity; NSCLC: non-small cell lung  
33 cancer; PBMCs: peripheral blood mononuclear cells; Pe: phycoerythrin; RT-PCR: reverse-  
34 transcriptase polymerase chain reaction; DMSO: dimethyl sulfoxide; OD: optical density;  
35 TA: tumor antigen; TNBC: triple negative breast cancer; TNF $\alpha$ : tumor necrosis factor  
36 alpha.

37 **Article category:** Tumor Immunology and Microenvironment

38 **Novelty and Impact:** Monoclonal antibody-redirected Fc $\gamma$ -CR T cell immunotherapy  
39 represents a promising approach in the fight against cancer. Here, we expand the  
40 application of this methodology to TNBC overexpressing the EGFR utilizing a novel  
41 CD32A<sup>131R</sup>-CR in combination with anti-EGFR mAbs. Our study supports the use of  
42 CD32A<sup>131R</sup>-CR T cells combined with panitumumab or cetuximab for targeting TNBC cells  
43 overexpressing the EGFR. Our results may be utilized as a platform for the rational design  
44 of therapies targeting TNBC overexpressing EGFR.

45

46 **ABSTRACT**

47 Cetuximab and panitumumab bind the human epidermal growth factor receptor (EGFR).  
48 While the chimeric cetuximab (IgG1) triggers antibody-dependent-cellular-cytotoxicity  
49 (ADCC) of EGFR positive target cells, panitumumab (a human IgG2) does not. The  
50 inability of panitumumab to trigger ADCC reflects a poor binding affinity of human IgG2 Fc  
51 for the Fc $\gamma$ RIII (CD16) on NK cells. However, both human IgG1 and IgG2 bind the Fc $\gamma$ RII  
52 (CD32) to a similar extent. Here, we have compared the ability of T cells, engineered with  
53 a novel low-affinity CD32<sup>131R</sup>-chimeric receptor (CR), and those engineered with the low-  
54 affinity CD16<sup>158F</sup>-CR T cells in eliminating EGFR positive epithelial cancer cells (ECCs) in  
55 combination with cetuximab or panitumumab. Following T cell transduction, the  
56 percentage of CD32<sup>131R</sup>-CR T cells was (74 $\pm$ 10) significantly higher than that of CD16<sup>158F</sup>-  
57 CR T cells (46 $\pm$ 15). Only CD32<sup>131R</sup>-CR T cells bound panitumumab. CD32<sup>131R</sup>-CR T cells  
58 combined with the mAb 8.26 (anti-CD32) and CD16<sup>158F</sup>-CR T cells combined with the mAb  
59 3g8 (anti-CD16) eliminated colorectal carcinoma (CRC), HCT116<sup>Fc $\gamma$ R+</sup> cells, in a reverse  
60 ADCC assay *in vitro*. Cross-linking of CD32<sup>131R</sup>-CR on T cells by cetuximab or  
61 panitumumab and CD16<sup>158F</sup>-CR T cells by cetuximab induced elimination of triple negative  
62 breast cancer (TNBC) MDA-MB-468 cells, and secretion of IFN gamma (IFN $\gamma$ ) and tumor  
63 necrosis factor alpha (TNF $\alpha$ ). Neither cetuximab nor panitumumab induced Fc $\gamma$ -CR T anti-  
64 tumor activity against KRAS-mutated HCT116, non-small-cell-lung-cancer, A549 and  
65 TNBC, MDA-MB-231 cells. ADCC of Fc $\gamma$ -CR T cells was significantly associated with the  
66 over-expression of EGFR on ECCs. In conclusion, CD32<sup>131R</sup>-CR T cells are efficiently  
67 redirected by cetuximab or panitumumab against BC cells overexpressing EGFR.

68

## 69 INTRODUCTION

70 The lytic activity of ADCC is influenced by multiple variables including the type of affinity by  
71 which the Fc fragment of an antibody binds to the Fc $\gamma$ R on a competent cytotoxic cell, the  
72 expression level of the targeted antigen on the surface of targeted cells, and the  
73 association constant of the antibody for the surface antigen of interest <sup>1</sup>. The Fc $\gamma$ R family  
74 includes CD16, CD32, and CD64. The former two receptors can be expressed in  
75 polymorphic forms, each of which displays different binding affinity for the Fc portion of  
76 IgG. The presence of valine at position 158 of CD16 (CD16<sup>158V</sup>) and of histidine at position  
77 131 of CD32 (CD32<sup>131H</sup>) identifies the high-affinity receptors while the presence of  
78 phenylalanine at position 158 (CD16<sup>158F</sup>) and of arginine at position 131 (CD32<sup>131R</sup>) of  
79 CD16 and CD32, respectively, defines low-affinity receptors <sup>2</sup>. Also, the activity of ADCC is  
80 influenced by the mAb subclasses since distinct subclasses have different association  
81 constants for the Fc $\gamma$ Rs CD16 and CD32. Cetuximab (IgG1) and panitumumab (IgG2) are  
82 currently utilized for the treatment of EGFR positive tumors. These two mAbs have  
83 demonstrated differential ability to mediate cell dependent cytotoxicity against EGFR  
84 positive epithelial cancer cells (ECCs) <sup>3</sup>. Only cetuximab mediates CD16 positive NK cell-  
85 dependent cytotoxicity of EGFR positive cancer cells. The differential activity of cetuximab  
86 and panitumumab reflects the low affinity of IgG2 for the Fc $\gamma$ R CD16 <sup>4</sup>. In contrast, CD32  
87 binds both IgG1 and IgG2 although with different affinity <sup>2</sup>.

88 The role of ADCC in the *in vitro* and *in vivo* antitumor activity of tumor antigen (TA)-  
89 specific mAbs <sup>5</sup> has stimulated interest in genetically engineering T cells with the CD16  
90 chimeric receptor (CD16-CR) <sup>6</sup>. In these cells, the extracellular domain of CD16 was  
91 ligated to cytotoxic signaling molecules fused with <sup>7,8</sup> or without <sup>9,10</sup> T cell costimulatory  
92 molecules. This strategy allows the rapid generation of polyclonal T cells with a potent  
93 cytotoxic activity when combined with mAbs recognizing TAs expressed on tumor cell  
94 membrane. Based on this background information, we have utilized cetuximab and

95 panitumumab as a model to demonstrate that CD32<sup>131R</sup>-CR T cells have higher cytotoxic  
96 activity than CD16<sup>158F</sup>-CR T cells since they eliminate EGFR positive cancer cells in  
97 combination with both cetuximab and panitumumab. In the present study, we have  
98 engineered T cells with a novel second generation of CD32<sup>131R</sup>-CR. The anti-tumor activity  
99 of CD32<sup>131R</sup>-CR T cells was compared to that of CD16<sup>158F</sup>-CR T cells in combination with  
100 cetuximab (IgG1) or panitumumab. Both engineered T cells, in combination with  
101 cetuximab, exerted a significant anti-tumor activity against breast cancer (BC) cells  
102 overexpressing the EGFR (EGFR<sup>high</sup>). However, only CD32<sup>131R</sup>-CR T cells effected  
103 cytotoxicity against EGFR<sup>high</sup> BC cells in combination with either cetuximab or  
104 panitumumab. Our results strongly suggest that CD32<sup>131R</sup>-CR has a potential to be utilized  
105 in Fc $\gamma$ -CR T cell-based immunotherapy of EGFR overexpressing BC cells.

106

## 107 **MATERIALS AND METHODS**

### 108 **Antibodies and Reagents**

109 Allophycocyanin (APC)-conjugated anti-human CD3 (cat. 555335), fluorescein  
110 isothiocyanate (FITC)-conjugated anti-human CD3 (cat. 555332), FITC-conjugated anti-  
111 human CD107A (cat. 555800), phycoerythrin (PE)-conjugated anti-human CD16 (cat.  
112 555407), PE-conjugated anti-human CD32 (cat. 550586), FITC-conjugated mouse anti-  
113 human IgG (cat. 555786), FITC-conjugated goat anti-mouse IgG (cat. 555748), mouse  
114 anti-human CD3 (cat. 555329), and anti-human CD28 (cat. 555725) were purchased from  
115 BD Bioscience (San Jose, CA, USA). Mouse anti-human CD16 (clone 3g8), mouse anti-  
116 human CD247 (CD3 $\zeta$ ) mAb (clone 6B10.2) and mouse anti-human EGFR antibody (clone  
117 AY13) were purchased from Biolegend (San Diego, CA, USA). Anti-human CD32 mAb  
118 (clone 8.26) was purchased from BD Bioscience (San Diego, CA). Anti-human B7-H3  
119 (CD276) mAb 376.96 was developed and characterized as described <sup>11</sup>. mAb 376.96 was  
120 purified from ascitic fluid by affinity chromatography on Protein A. The activity and purity of  
121 mAb preparations was monitored by binding assays and SDS-PAGE. Cetuximab (Erbix)  
122 and Panitumumab (Vectibix) were from Merck Serono (Darmstadt, Germany) and Amgen  
123 (Thousand Oaks, CA, USA), respectively. Anti-phospho Tyr142 (Y142) CD3 $\zeta$  mAb (cat.  
124 ab68235) was purchased from Abcam (Cambridge, UK). 3-(4,5-Dimethylthiazol-2-Yl)-2,5-  
125 Diphenyltetrazolium Bromide (MTT) was obtained from Sigma-Aldrich (Saint Louis, MO,  
126 USA). FcR blocking reagent (BR) was purchased from Miltenyi (Bergisch Gladbach,  
127 Germany). GeneJuice<sup>®</sup> Transfection Reagent (Novagen) was from Millipore (Burlington,  
128 MA, USA). Human recombinant interleukin-7 (IL-7) and interleukin-15 (IL-15) were from  
129 Peprotech (London, UK). Lipofectamine 2000 was from Life Technologies (Carlsbad, CA,  
130 USA), and Retronectin (Recombinant Human Fibronectin) was purchased from Takara Bio  
131 (Saint-Germain-en-Laye, France).

## 132 **Cell lines**

133 The 293T packaging cell line was used to generate the helper-free retroviruses for T cell  
134 transduction. 293T cells were cultured in Iscove's Modified Dulbecco's Medium (IMDM)  
135 supplemented with 10% Fetal Bovine Serum (FBS), 2mM L-glutamine, 0.1mg/mL  
136 streptomycin and 100U/ml penicillin hereafter referred to as IMDM complete medium (CM).  
137 KRAS-mutated A549 and HCT116 cell lines were maintained in RPMI-1640 CM. KRAS-  
138 mutated TNBC cells, MDA-MB-231, and KRAS wild-type TNBC cells, MDA-MB-468, were  
139 cultured in Dulbecco's Modified Eagle's Medium (DMEM) CM (Thermo Fisher Scientific,  
140 Waltham, MA, USA). 293T cells were kindly provided by Dr. Gianpietro Dotti, University of  
141 North Carolina, Chapel Hill, USA. A549 cells were kindly provided by Dr. Antonio Rossi,  
142 National Research Council, Italy. MDA-MB-231 and MDA-MB-468 cells were kindly  
143 provided by Dr. Maria Lucibello, National Research Council, Italy. HCT116 cells were  
144 kindly provided by Dr. Giulio Cesare Spagnoli, University of Basel, Switzerland.  
145 Mycoplasma-free cancer cell lines utilized in our study are part of our lab collection.  
146 Authentication test was successfully performed on November 21th, 2018 by PCR-single-  
147 locus-technology (Eurofins, Ebersberg, Germany). Cell lines were passaged for 4 to 8  
148 times before use or kept in culture for a maximum of 6 weeks.

## 149 **CD32<sup>131R</sup>-CR construction**

150 The signal peptide (nucleotide 1 - 101) and the extracellular region (nucleotide 102 - 651)  
151 of the low-affinity variant CD32A<sup>131R</sup>, hereafter referred to as CD32<sup>131R</sup>, was amplified by  
152 reverse-transcriptase polymerase chain reaction (RT-PCR) from RNA extracted from  
153 freshly isolated peripheral blood mononuclear cells (PBMCs) utilizing the following primers:  
154 forward 5'-GAGAATTCACCATGACTATGGAGACCCAAATG-3' and reverse 5'-  
155 CGTACGCCCCATTGGTGAAGAGCTGCC-3' (Thermo Fisher Scientific, Waltham, MA,  
156 USA). The PCR product was fused in tandem by restriction enzyme-compatible ends with

157 the CD8 $\alpha$  transmembrane domain and the CD28 and CD3 $\zeta$  intracellular regions already  
158 available in the lab (CD32<sup>131R</sup>-CR). The generation of CD16<sup>158F</sup>-CR has already been  
159 described <sup>8</sup>. The CD32<sup>131R</sup>-CR and CD16<sup>158F</sup>-CR genes were subcloned into the NcoI and  
160 MluI sites of the SFG retroviral vector.

## 161 **Retrovirus production and T cell transduction**

162 Retroviral supernatants were obtained by transient transfection of 293T packaging cells,  
163 using the GeneJuice reagent, with the following vectors: the Peg-Pam vector containing  
164 the Moloney murine leukemia virus gag and pol genes, the RDF vector containing the  
165 RD114 envelope and the CD32<sup>131R</sup>-CR or CD16<sup>158F</sup>-CR SFG retroviral vectors. Forty-eight  
166 and 72h post-transfection, the conditioned medium containing the retrovirus was  
167 harvested, filtered, snap frozen, and stored at -80°C until use. For the generation of Fc $\gamma$ -  
168 CR T cells, PBMCs (0.5x10<sup>6</sup> PBMCs/ml) were cultured for 3 days in a non-tissue culture  
169 treated 24-well plate pre-coated with 1 $\mu$ g/ml of anti-CD3 and 1 $\mu$ g/ml of anti-CD28 mAbs in  
170 the presence of 10 ng/ml of IL-7 and 5ng/ml of IL-15. The viral supernatant was loaded on  
171 retronectin-coated non-tissue culture treated 24 well plates and spun for 1.5h at 2000xg.  
172 Activated T cells were seeded into the retrovirus loaded-plate, spun for 10', and incubated  
173 for 72h at 37°C in 5% CO<sub>2</sub>. After transduction, T cells were expanded in RPMI-1640 CM  
174 supplemented with 10ng/ml of IL-7 and 5 ng/ml of IL-15 for 12-13 days and analyzed.

## 175 **Western blot**

176 CD32<sup>131R</sup>-CR transduced and non-transduced T cells were lysed with Triton buffer  
177 composed of 1% (v/v) Triton X-100, 20mM Tris-HCL pH7.6, 137mM NaCl, 1mM MgCl<sub>2</sub>,  
178 1mM CaCl<sub>2</sub>, 2mM phenylmethylsulfonyl fluoride (PMSF) supplemented with phosphatase  
179 (Sigma-Aldrich, Saint Louis, MO, USA) and protease (Roche, Basel, Switzerland) inhibitor  
180 cocktails. Thirty micrograms of protein lysates were resolved on Bolt 4-12% Bis-Tris plus



181 gel (Invitrogen, Carlsbad, CA, USA) under reducing conditions and transferred to a  
182 nitrocellulose filter. The filter was probed overnight at 4°C with a mouse anti-human CD3ζ  
183 or rabbit anti-phospho-tyrosine CD3ζ (Y142) antibody. The latter was detected utilizing a  
184 horseradish peroxidase-conjugated donkey anti-mouse (Jackson Laboratory, Bar Harbor,  
185 ME, USA) for 1h at room temperature. Antibody binding was visualized with Amersham  
186 ECL Western blotting detection reagent (GE Healthcare, Little Chalfont, UK).

### 187 **Binding assay**

188 A direct immunofluorescence analysis was utilized to test the Fc antibody-binding ability of  
189 a FITC-conjugated anti-CD107A mAb to the CD32<sup>131R</sup>-CR and CD16<sup>158F</sup>-CR. CD32<sup>131R</sup>-  
190 CR and CD16<sup>158F</sup>-CR T cells were incubated with 5μl of FITC-conjugated anti-CD107A,  
191 with or without Fc receptor blocking reagent (FcR BR) for 30 min at at 4°C. Then, cells  
192 were washed and analyzed by flow cytometry. Cetuximab or panitumumab Fc fragment  
193 binding to CD32<sup>131R</sup>-CR or CD16<sup>158F</sup>-CR T cells was evaluated by staining with a FITC-  
194 conjugated anti-human IgG.

### 195 **Flow cytometry**

196 Expression of CD32<sup>131R</sup>-CR or CD16<sup>158F</sup>-CR on transduced T cells was assessed by  
197 staining for 30 min at 4°C with FITC-conjugated anti-human CD3, PE-conjugated anti-  
198 human CD32 or PE-conjugated anti-human CD16 mAbs, respectively. Cells were then  
199 analyzed by a 2-laser BD FACSCalibur (Becton Dickinson, Franklin Lakes, NJ, USA) flow  
200 cytometer. Results were analyzed utilizing Tree Star Inc. FlowJo software.

### 201 **Cytokine release assay**

202 CD32<sup>131R</sup>-CR or CD16<sup>158F</sup>-CR transduced T cells (2x10<sup>5</sup>/well) were added to 96 well plates  
203 previously coated with 10μg/ml of anti-CD3, 3g8 or 8.26 mAbs. In co-culture experiments,

204 CD16<sup>158F</sup>-CR T cells or CD32<sup>131R</sup>-CR T cells were plated in 96-well plates with target cell  
205 lines at 5:1 E:T ratio in the presence or absence of 3µg/ml of cetuximab or panitumumab  
206 or the anti-B7-H3 mAb, 376.96. Supernatants were collected after 24 or 48h of culture.  
207 IFN $\gamma$  and TNF $\alpha$  levels were measured by ELISA (Thermo Fisher Scientific, Waltham, MA,  
208 USA).

### 209 ***In vitro* tumor cell viability assay**

210 Tumor target cells (7x10<sup>3</sup>/well) were seeded into 96-well plates and CD16<sup>158F</sup>-CR T cells  
211 or CD32<sup>131R</sup>-CR T cells (35x10<sup>3</sup>/well) were added in the presence or absence cetuximab or  
212 panitumumab or the anti-B7-H3 mAb 376.96 (3µg/ml) (see above). Following a 48h  
213 incubation at 37°C, non-adherent T cells were removed. Then a suspension of fresh  
214 medium (100µl/well) supplemented with MTT (20µl/5mg/ml) was added to the adherent  
215 cells for 3h at 37°C. MTT was then removed and 100µl of dimethyl sulfoxide was added to  
216 each well. Absorbance (optical density, OD) was measured at 570 nm.

### 217 **Statistical analysis**

218 Results were analyzed by a Paired-*T*-test or a Mann-Whitney test. The relationship  
219 between the two variables was measured by the Spearman's rank correlation coefficient.  
220 Differences with *p*-value < 0.05 were considered significant.

221

222

## 223 **RESULTS**

### 224 **CD32<sup>131R</sup> and CD16<sup>158F</sup> CRs are differentially expressed on T cells.**

225        Activated T cells were transduced *in vitro* with a gamma-retroviral vector encoding  
226 the CD32<sup>131R</sup>-CR (fig. 1A). Cells were then tested for expression of CD32<sup>131R</sup>-CR by  
227 western blot and flow cytometry analysis. For biochemical analysis, we utilized two mAbs  
228 specific for the non-phosphorylated and phosphorylated CD3 $\zeta$  chain. Both mAbs detected  
229 2 distinct bands. The band of a MW slightly higher than 51 kDa matches with the expected  
230 size of the CD32<sup>131R</sup>-CR while the smaller 18 kDa band detected in both control and  
231 CD32<sup>131R</sup>-CR expressing T cells corresponds to the endogenous CD3 $\zeta$  chain (fig. 1B). By  
232 flow cytometry, CD32<sup>131R</sup>-CR was clearly detectable on the cell surface of engineered T  
233 cells (fig. 1C, left panel). Transduction efficiency of CD32<sup>131R</sup>-CR was significantly higher  
234 than that of CD16<sup>158F</sup>-CR (74%  $\pm$  10% vs. 46%  $\pm$  15%,  $p < 0.001$ ) (fig. 1C, right panel).

### 235 **CD32<sup>131R</sup>-CR specifically bound the Fc fragment of soluble immunoglobulins.**

236        In initial experiments, we compared the ability of CD32<sup>131R</sup>-CR and CD16<sup>158F</sup>-CR T  
237 cells to bind soluble IgG Fc fragment. As a model reagent, we chose the H4A3 mAb, a  
238 FITC-conjugated IgG1 specific for CD107A, an intracellular lysosomal-associated  
239 membrane protein (LAMP-1). We first evaluated the binding of anti-CD107A mAb on the  
240 surface of CD32<sup>131R</sup>-CR T cells in comparison to CD16<sup>158F</sup>-CR T cells. Following a 30 min  
241 incubation at room temperature, CD32<sup>131R</sup>-CR T cells effectively bound anti-CD107A mAb  
242 on their surfaces (fig. 2A, left panel) whereas CD16<sup>158F</sup>-CR did not (fig. 2A, right panel).  
243 Binding was highly specific since it was abrogated in the presence of FcR blocking reagent  
244 (BR). To further evaluate whether CD32<sup>131R</sup>-CR T cells were capable of binding mAb Fc  
245 fragment, in a more physiological condition, we tested whether the Fc fragment-binding

246 capacity of CD32<sup>131R</sup>-CR was preserved in the presence of human immunoglobulins.  
247 Therefore, we incubated anti-CD107A with CD32<sup>131R</sup>-CR T cells in a buffer containing 10%  
248 of human plasma (fig. 2B). Following a 30 min incubation, at room temperature, anti-  
249 CD107A mAb was still bound to engineered T cells (fig. 2B).

250 To assess the Fc $\gamma$ -CR T cell potential to target EGFR<sup>+</sup> ECCs, upon incubation with  
251 anti-EGFR mAbs, we tested their antibody-binding capacity by utilizing cetuximab and  
252 panitumumab mAbs. Only CD32<sup>131R</sup>-CR T cells bound the Fc fragment of both soluble  
253 anti-EGFR mAbs (fig. 2C middle, panels) with higher binding capacity for cetuximab, as  
254 compared to panitumumab (fig. 2C, lower panels). Of note, binding of both mAbs was  
255 abolished in the presence of FcR BR (fig. 2C). Finally, we performed a dose-response  
256 binding assays, in which cetuximab was incubated at increasing concentrations with the  
257 Fc $\gamma$ -CR T cells for 30 min at 4°C. As shown in Fig. 2D, only CD32<sup>131R</sup>-CR T cells (solid  
258 lines) bound cetuximab. The maximum binding capacity of CD32<sup>131R</sup>-CR, expressed as  
259 both percentages and MFI of positive cells, was achieved at concentrations ranging  
260 between 1-10  $\mu$ g/ml of cetuximab. These results demonstrate that CD32<sup>131R</sup>-CR T cells  
261 have a superior binding ability for soluble mAbs than CD16<sup>158F</sup>-CR T cells.

262 **CD32<sup>131R</sup>-CR and CD16<sup>158F</sup>-CR T cells eliminate KRAS-mutated HCT116<sup>Fc $\gamma$ R<sup>+</sup></sup> cells in**  
263 **redirected ADCC assays and release IFN $\gamma$  and TNF $\alpha$  upon specific antigen**  
264 **stimulation.**

265 Next, we tested the ability of Fc $\gamma$ -CR-transduced T cells to elicit cytotoxic activity in  
266 a reverse ADCC assay (fig. 3A). To this end, CD32<sup>131R</sup>-CR T cells and CD16<sup>158F</sup>-CR T  
267 cells were incubated in the presence of HCT116 cells, stably transfected with CD32, in the  
268 presence of the anti-CD32 and anti-CD16 mAbs respectively. Tumor cell viability was  
269 analyzed after 48h by MTT assay. Incubation with either CD32<sup>131R</sup>-CR T cells or CD16<sup>158F</sup>-

270 CR T cells significantly reduced numbers of viable HCT116<sup>FcγR+</sup> cells, consistent with  
271 efficient Fc-mediated cytotoxic activity. Furthermore, cross-linking of either Fcγ-receptor  
272 with specific mAbs induced the release of comparable amounts of IFN $\gamma$  and TNF $\alpha$  (fig.  
273 3B). These data indicate that both CD32<sup>131R</sup>-CR T cells and CD16<sup>158F</sup>-CR T cells clearly  
274 mediate comparable levels of reverse ADCC when given in combination with the mAbs  
275 8.26 and 3g8 respectively.

276 **CD32<sup>131R</sup>-CR T cells and CD16<sup>158F</sup>-CR T cells differ in their ability to eliminate MD-**  
277 **MB-468 cells, in combination with cetuximab and panitumumab.**

278 The ability of CD32<sup>131R</sup>-CR to specifically bind the cetuximab Fc fragment prompted  
279 us to investigate whether this binding triggers ADCC against EGFR<sup>+</sup> cancer cell lines.  
280 CD32<sup>131R</sup>-CR T cells and CD16<sup>158F</sup>-CR T cells were incubated with many ECC lines at an  
281 E:T ratio of 5:1. Tumor cell viability was assessed following a 48h incubation at 37°C.  
282 CD32<sup>131R</sup>-CR T cells significantly reduced the viability of MDA-MB-468 cells in the  
283 presence of cetuximab or panitumumab while CD16<sup>158F</sup>-CR T cells were only effective in  
284 the presence of cetuximab (fig. 4). In contrast, anti-B7-H3 379.96 mAb, which stained  
285 MDA-MB-468 cells, did not cause any detectable change in ECC viability. Neither  
286 cetuximab nor panitumumab had detrimental effects on MDA-MB-468 cells in the absence  
287 of Fcγ-CR T cells (fig. 4). However, CD32<sup>131R</sup>-CR T cells and CD16<sup>158F</sup>-CR T cells in  
288 combination with cetuximab or panitumumab failed to affect the viability of EGFR<sup>+</sup> MDA-  
289 MB-231, A549, and HCT116 cells (fig. 4).

290 Crosslinking of CD16<sup>158F</sup>-CR on engineered T lymphocytes cultured with MDA-MB-  
291 468 breast cancer cells promoted the release of IFN $\gamma$  (fig. 5A) and TNF $\alpha$  (fig. 5B) in the  
292 presence of cetuximab but not of panitumumab. In contrast, both mAbs triggered the  
293 release of both cytokines by CD32<sup>131R</sup>-CR engineered T cells.

294 Furthermore, although panitumumab failed to mediate cell dependent cytotoxicity  
295 against the A549 and HCT116 cell lines, it induced a significant release of IFN $\gamma$  by  
296 CD32<sup>131R</sup>-CR T cells (fig.5A) incubated with the two cell lines.

297 **Correlation of EGFR expression level on targeted cancer cell lines with the**  
298 **cetuximab dependent Fc $\gamma$ -CR T cell cytotoxicity.**

299 Our results indicate that among the EGFR<sup>+</sup> cancer cell lines evaluated, only MDA-  
300 MB-468 cells were efficiently killed by CD16<sup>158F</sup>-CR T cells in combination with cetuximab  
301 and by CD32<sup>131R</sup>-CR T cells in combination with cetuximab or panitumumab (fig. 4). Since  
302 MDA-MB-468 cells express high levels of EGFR<sup>12</sup>, we hypothesized that the ability of  
303 cetuximab to mediate ADCC activity of Fc $\gamma$ -CR T cells against ECCs is associated with  
304 EGFR expression level on target cells. To test this hypothesis, we measured EGFR  
305 expression level on the surface of HCT116, A549, MDA-MB-231, and MDA-MB-468 cells  
306 and correlated it with the ability of cetuximab to mediate Fc $\gamma$ -CR T cell cytotoxicity with  
307 target cells (fig. 6). As expected, MDA-MB-468 cells displayed the highest MFI upon  
308 staining with fluorochrome-labeled anti-EGFR mAb (fig. 6A). Furthermore, the ability of  
309 both CD16<sup>158F</sup>-CR and CD32<sup>131R</sup>-CR to reduce the viability of EGFR<sup>+</sup> ECCs, in  
310 combination with cetuximab, displayed a highly significant correlation with the MFI of the  
311 target marker by the cancer cell lines tested (fig. 6B).

312

313

314

315

316 **DISCUSSION**

317 Rituximab and trastuzumab have been utilized to redirect first and second generation  
318 CD16<sup>158V</sup>-CR T cells against CD20<sup>+</sup> and HER2<sup>+</sup> hematologic and solid malignancies,  
319 respectively <sup>7,9,10</sup>. The results obtained in pre-clinical studies suggest that CD16<sup>158V</sup>-CR T  
320 cells may act as universal chimeric receptor-effector cells capable of improving therapeutic  
321 effectiveness of TA-specific mAbs by an ADCC mechanism. The rationale, underlying the  
322 choice of the high-affinity extracellular CD16<sup>158V</sup>, for manufacturing Fc chimeras, is that  
323 CD16 triggers ADCC in NK cells <sup>13</sup>. However, myeloid cells such as  
324 monocyte/macrophages and granulocytes can also mediate effector functions such as  
325 proinflammatory cytokine production <sup>14,15</sup> and cell-mediated cytotoxicity <sup>16</sup> including ADCC  
326 <sup>17,18</sup>. Although CD16 is the major player in mediating ADCC, CD32 is also capable of  
327 promoting ADCC by myeloid cells <sup>17</sup>. Similarly to CD16, CD32 is characterized by low  
328 (CD32<sup>131R</sup>) and high affinity (CD32<sup>131H</sup>) polymorphisms <sup>2</sup>.

329 To date, there is scant information about the anti-tumor activity of CD16<sup>158F</sup>-CR T  
330 cells and the role of CD32<sup>131R</sup>-CR T cells is completely unknown. Growing experimental  
331 evidence suggests that CD16<sup>158F</sup> and CD32<sup>131R</sup> polymorphisms show differential binding  
332 affinities for IgG1 and IgG2 mAb Fc portions. Taking advantage from the availability of  
333 cetuximab (IgG1) and panitumumab (IgG2), here we demonstrate, for the first time, that  
334 both CD32<sup>131R</sup>- and CD16<sup>158F</sup>-CR T cells trigger ADCC to the TNBC cells, MDA-MB-468.  
335 In a side by side comparison, we show the superiority of CD32<sup>131R</sup>-CR over CD16<sup>158F</sup>-CR  
336 in redirecting engineered T cells against the MDA-MB-468 cells through anti-EGFR mAbs  
337 at least *in vitro*.

338 The transduction frequency of a retroviral vector encoding CD32<sup>131R</sup>-CR was  
339 significantly higher than that of CD16<sup>158F</sup>-CR. The higher expression frequency of

340 CD32<sup>131R</sup>-CR on T cells may reflect the preferential propensity of hematopoietic  
341 cells to express CD32 as compared to CD16<sup>158F</sup><sup>19</sup>. This result may be of relevance for  
342 manufacturing high numbers of selected engineered T cells for *in vivo* pre-clinical and  
343 clinical studies.

344 The affinity of CD16<sup>158F</sup>-CR and CD32<sup>131R</sup>-CR for IgG1 and IgG2 mAbs was significantly  
345 different. CD32<sup>131R</sup>-CR bound Fc fragments of soluble IgG1 (anti-CD107A and cetuximab)  
346 and to a lesser extent IgG2 (panitumumab) while CD16<sup>158F</sup>-CR T cells bound neither. The  
347 differential binding ability of cetuximab and panitumumab to CD32<sup>131R</sup>-CR is not surprising  
348 since CD32<sup>131R</sup> polymorphisms bind IgG1 with a significantly higher affinity than IgG2. On  
349 the other hand, the failure of CD16<sup>158F</sup>-CR to bind soluble cetuximab (IgG1) is surprising  
350 since CD16<sup>158F</sup> polymorphism has slightly lower ability to bind IgG1 than CD32<sup>131R</sup><sup>2</sup>. Our  
351 results are a bit different from those of Kudo et al. who showed a weak but detectable  
352 binding of soluble IgG1 mAbs, such as rituximab and trastuzumab, to CD16<sup>158F</sup>-CR. The  
353 different results obtained by Kudo et al<sup>7</sup> and by ourselves may reflect structural  
354 differences between the CD16<sup>158F</sup>-CR endodomain.

355 The induction of an effective ADCC of tumor cells by Fc $\gamma$ R+ cytotoxic T cells needs  
356 to meet at least three distinct criteria. They include i) the presence of Fc $\gamma$ R+ cytotoxic T  
357 cells with a functional lytic machinery; ii) Fc $\gamma$ R binding affinity for the tested mAb Fc  
358 fragment sufficient to activate T cells; and iii) surface expression level of the antigen  
359 targeted by the tested mAb sufficient to activate effector mechanisms in T cells. Indeed,  
360 both CD16<sup>158F</sup>-CR and CD32<sup>131R</sup>-CR engineered T cells fully satisfy the first condition  
361 since anti-CD16 and anti-CD32 mAbs triggered a similar level of reverse ADCC when  
362 tested with KRAS-mutated, Fc $\gamma$ R positive, HCT116 cells. However, CD16<sup>158F</sup>-CR T cells  
363 and CD32<sup>131R</sup>-CR T cells, in combination with cetuximab, neither released IFN $\gamma$  and TNF $\alpha$



364 nor eliminated KRAS mutated ECCs including A549, HCT116, and MDA-MB-231 cells  
365 <sup>20,21</sup>, although they were fully activated by the EGFR overexpressing MDA-MB-468 cells.

366 The differential antitumor activity of both Fc $\gamma$ -CR T cells with wild type and KRAS-  
367 mutated ECC cells deserves some comments. The inability of both Fc $\gamma$ -CR T cells to  
368 eliminate KRAS-mutated ECC cells does not reflect a mechanism of resistance of these  
369 target cells to the lytic activity of the two effector cells tested, since both of them can  
370 eliminate KRAS-mutated HCT116<sup>Fc $\gamma$ R+</sup> cancer cells in a redirect ADCC assay. On the other  
371 hand, the higher sensitivity of the wild type MDA-MB-468 than of the tested KRAS-mutated  
372 ECCs is likely to reflect the differential levels of surface EGFR expression. Indeed, the  
373 KRAS wild type, MDA-MB-468 cells overexpress EGFR <sup>22</sup> at a level higher than that on  
374 the KRAS-mutated ECCs utilized in this study. Our hypothesis is supported by Derer et  
375 al.'s finding that a KRAS mutation impairs the sensitivity of CRC cells to anti-EGFR mAbs  
376 because of C/EBP $\beta$ -dependent downregulation of EGFR expression <sup>23</sup>.

377 The restoration of the sensitivity of KRAS-mutated ECCs to Fc $\gamma$ -CR T cell lytic  
378 activity may require the generation of CD32-CR and CD16-CR with high affinity for the  
379 used mAb Fc fragments such as CD32<sup>131H</sup>-CR and CD16<sup>158V</sup>-CR. This strategy is  
380 supported by the ability of ECCs opsonized with anti-EGFR mAbs to induce a level of  
381 FC $\gamma$ R cross-linking insufficient to fully mediate ADCC, but sufficient to stimulate other FC $\gamma$ -  
382 CR T cell functions such as cytokine production. In its support, we show that HCT116 and  
383 A549 cells, opsonized with panitumumab, promote IFN $\gamma$  and TNF $\alpha$  release from CD32<sup>131R</sup>-  
384 CR T cells.

385 As a consequence, failure to generate an effective ADCC could be related to  
386 inadequate expression of EGFR on the surface of ECCs. In support of this hypothesis,  
387 CD16<sup>158F</sup>-CR T and CD32<sup>131R</sup>-CR T cells in combination with cetuximab damaged wild-

388 type MDA-MB-468 cells overexpressing EGFR. Indeed, the results shown in figure 6  
389 indicate that the extent of ECC reduced viability induced by the combination of either  
390 CD16<sup>158F</sup>-CR T cells or CD32<sup>131R</sup>-CR T cells with cetuximab directly correlated with EGFR  
391 expression levels on target ECCs. EGFR cross-linking MDA-MB-468 cells, with Fc $\gamma$ -CR T  
392 cells and cetuximab, led to ADCC activation. The ability of CD16<sup>158F</sup>-CR T cells to mediate  
393 ADCC in the presence of cetuximab is somewhat unexpected since no binding of soluble  
394 cetuximab to these cells could be detected. This finding may reflect the ability of CD16<sup>158F</sup>-  
395 CR T cells to bind cetuximab only after EGFR cancer cell opsonization, which stabilizes  
396 ligand-receptor interactions.

397 Unlike cetuximab (IgG1), panitumumab (IgG2) did not induce significant ADCC by NK cells  
398 limiting its applications in cell-based cancer immunotherapy <sup>24</sup>. However, panitumumab is  
399 still able to trigger ADCC by macrophages, which, with the exception of a small subset of  
400 cells <sup>25</sup>, do not express CD16 but express CD32 and CD64 <sup>26</sup>. As a logical consequence,  
401 engineering cytotoxic T cells with a CD32<sup>131R</sup>-CR has allowed us to demonstrate that  
402 panitumumab can stimulate strong ADCC by CD32<sup>131R</sup>-CR T cells against MDA-MB-468  
403 cells overexpressing EGFR. These results open new perspectives for the use of  
404 panitumumab in cell-based targeted immunotherapy of solid tumors.

#### 405 **ACKNOWLEDGMENTS**

406 This work was supported by the Italian Association for Cancer Research (AIRC) under  
407 grant IG17120. We thank Spagnoli G.C., Coccia M., and Rossi A. for technical support and  
408 Dr. Paggiolu M. and Dr. Papa P. for administrative assistance.

409

410

411

412 **FIGURES.**

413 **FIGURE 1.**

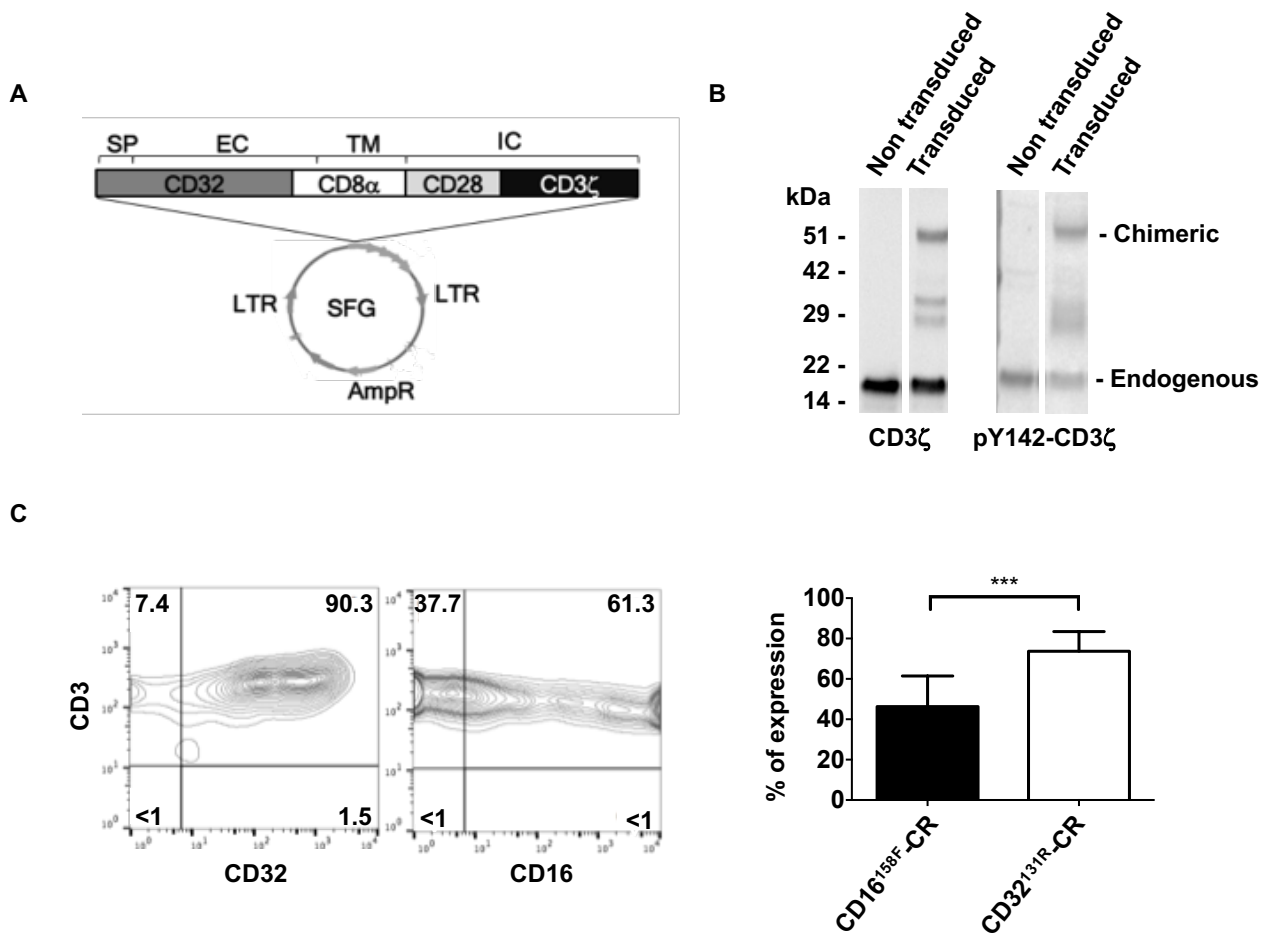

414

415 **Figure 1. Molecular structure and expression efficiency of CD32<sup>131R</sup>-CR in T cells. A).**

416 Schematic representation of the CD32<sup>131R</sup>-CR gene cloned into the SFG retroviral vector.

417 The CR transgene included the signal peptide (SP) and the extracellular domain (EC) of

418 CD32<sup>131R</sup> fused in tandem with the transmembrane (TM) region of CD8 $\alpha$  and the

419 intracellular (IC) signal motifs of CD28 and CD3 $\zeta$ . B). Western blot analysis of CD3 $\zeta$

420 expression in CD32<sup>131R</sup>-CR T cells. Soluble fractions of the cell lysates were separated,

421 under reducing conditions, by SDS-PAGE gel electrophoresis and transferred on

422 nitrocellulose filter membranes. Non-phosphorylated and phosphorylated CD3 $\zeta$  were

423 immunoblotted utilizing anti-CD3 $\zeta$  and anti-phospho-Y142-CD3 $\zeta$  mAbs, respectively.

424 Lower bands refer to endogenous CD3 $\zeta$  in both transduced and non-transduced T cells.  
425 Upper bands show the chimeric CD3 $\zeta$  with the expected molecular weight specifically  
426 detected in transduced T cells. C). Following Fc $\gamma$ -CR T cell transduction, cells were  
427 cultured for 3 days at 37°C in the presence of IL-7 and IL-15. Cells were then stained with  
428 FITC-anti-CD3 and PE-anti-CD32 or PE-anti-CD16 mAbs. Cells were analyzed by flow  
429 cytometry utilizing a BD-FACSCalibur™. The frequency of Fc $\gamma$ -CR<sup>+</sup> T cells was calculated  
430 by evaluating percentages of CD3<sup>+</sup>CD32<sup>+</sup> or CD3<sup>+</sup>CD16<sup>+</sup> cells. This panel shows a  
431 representative experiment (left) and a cumulative analysis (right) of the results obtained  
432 from 10 different experiments. Numbers in the quadrants: % of cells; \*\*\*: p ≤ 0.001.

433

434

435

436

437

438

439

440

441

442

443

444

445 **FIGURE 2.**

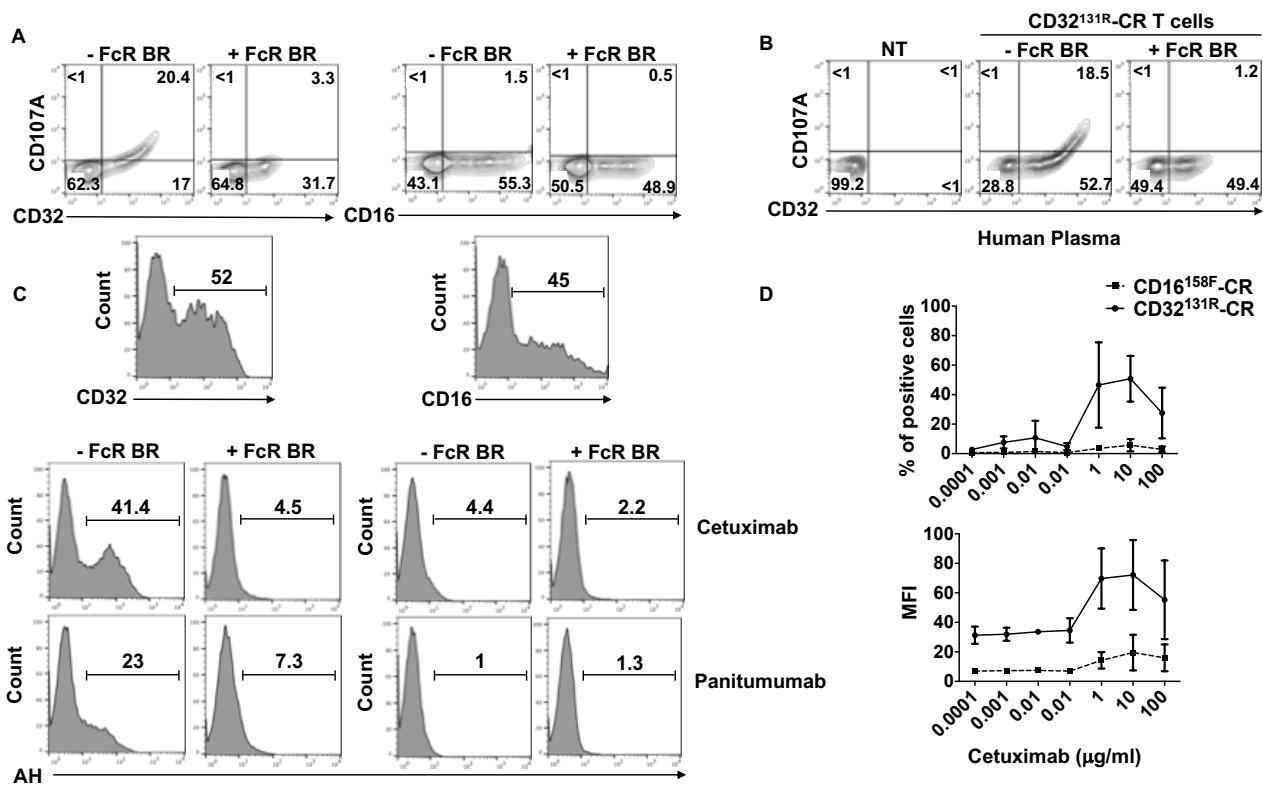

446

447 **Figure 2. Analysis of the binding of mAb Fc fragments to CD32<sup>131R</sup>-CR and CD16<sup>158F</sup>-**  
 448 **CR engineered T cells.** The ability of CD32<sup>131R</sup>-CR T cells or CD16<sup>158F</sup>-CR T cells to bind  
 449 specifically the Fc fragment of a FITC-conjugated anti-CD107A mAb was assessed.  
 450 Following T cell transduction, blast cells were incubated for 20 min at 4°C with or without  
 451 FcR BR in the absence (panel A) or presence (panel B) of 10% of human plasma. T cells  
 452 were then washed and stained with fluorescent mAbs specific for the indicated markers  
 453 and analyzed by flow cytometry. The binding of cetuximab or panitumumab Fc fragment on  
 454 CD32<sup>131R</sup>-CR T cells (panel C, left) or CD16<sup>158F</sup>-CR T cells (panel C, right) was evaluated  
 455 upon incubation with 3μg/ml of either cetuximab or panitumumab for 30 min at 4°C with or  
 456 without FcR BR. Cells were then washed and stained with a FITC-conjugated mouse anti-  
 457 human Ig antibody (AH). The binding of cetuximab and panitumumab was analyzed by  
 458 flow cytometry. The maximum binding capacity of CD32<sup>131R</sup>- and CD16<sup>158F</sup>-CRs by  
 459 cetuximab Fc fragment was determined in dose-response experiments (panel D).

460 CD32<sup>131R</sup>-CR T cells (solid line) or CD16<sup>158F</sup>-CR T cells (dashed line) were incubated with  
 461 increasing doses of cetuximab for 30 min, washed and then incubated with FITC-  
 462 conjugated mouse anti-human Ig antibodies. Numbers in quadrants refer to percentages  
 463 of positive cells. BR: blocking reagent, NT: not transduced.

464 **FIGURE 3.**

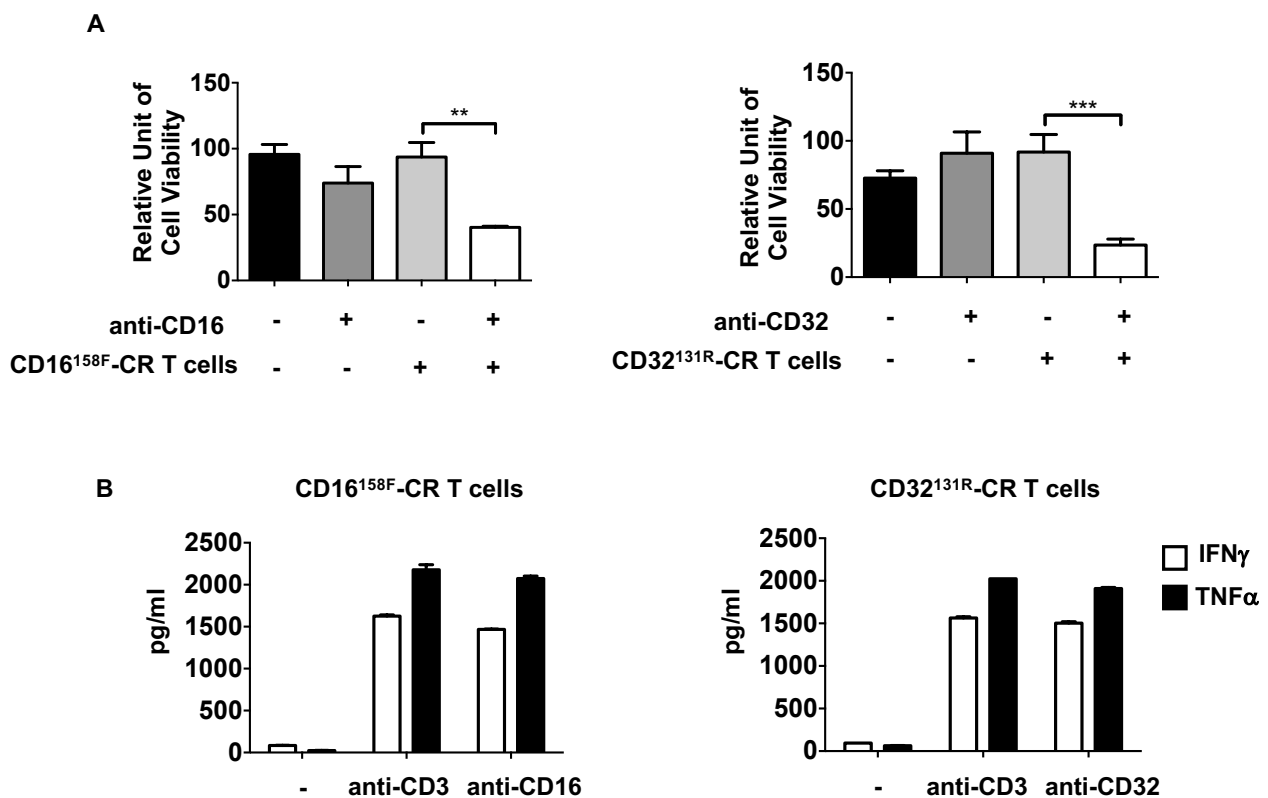

465

466 **Figure 3. CD32<sup>131R</sup>-CR and CD16<sup>158F</sup>-CR engineered T cells are cytotoxic and**  
 467 **produce equivalent amounts of IFN $\gamma$  and TNF $\alpha$ .** A) Redirected ADCC against  
 468 HCT116<sup>Fc $\gamma$ R+}</sup> cells. CD32<sup>131R</sup>-CR T cells or CD16<sup>158F</sup>-CR T cells were incubated with  
 469 HCT116<sup>Fc $\gamma$ R+}</sup> for 48h, at 37°C, at an E:T ratio of 5:1, with or without 8.26 (anti-CD32) or 3g8  
 470 (anti-CD16) mAbs. The viability of HCT116<sup>Fc $\gamma$ R+}</sup> cells was evaluated by the MTT assay. B)  
 471 Plastic bound 8.26 mAb or 3g8 mAb induces IFN $\gamma$  and TNF $\alpha$  release in culture  
 472 supernatants of Fc $\gamma$ -CR T cells. Following cross-linking of CD32<sup>131R</sup>-CR or CD16<sup>158F</sup>-CR

473 by plastic coated 8.26 or 3g8 as described in the method section, Fc $\gamma$ -CR T cell  
474 supernatants were collected and IFN $\gamma$  and TNF $\alpha$  contents were measured by ELISA.

475 **FIGURE 4.**

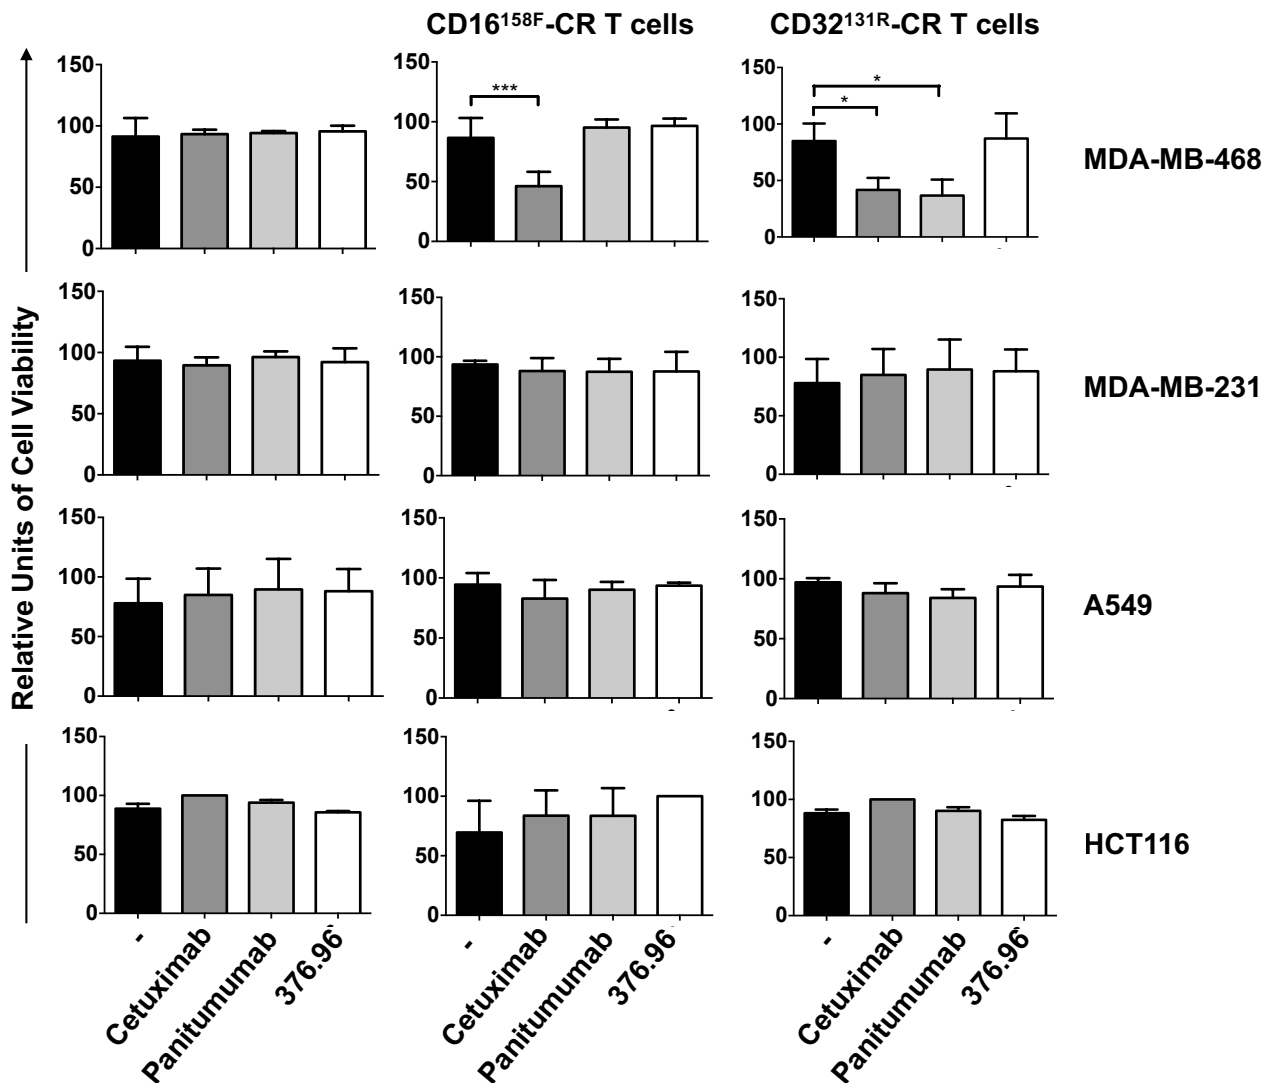

476

477 **Figure 4. CD32<sup>131R</sup>-CR T cells eliminate MDA-MB-468 cells more efficiently than**  
478 **CD16<sup>158F</sup>-CR T cells.** Anti-tumor activity of CD32<sup>131R</sup>-CR T cells and CD16<sup>158F</sup>-CR T cells  
479 was tested in combination with the indicated mAbs against EGFR<sup>+</sup> and B7-H3<sup>+</sup> cancer  
480 cells. TNBC cells, MDA-MB-468 and KRAS-mutated MDA-MB-231, NSCLC cells A549 and  
481 CRC cells HCT116, were chosen as target cells. MTT assays of tumor cell viability were  
482 performed following a 48h incubation, at 37°C, with CD32<sup>131R</sup>-CR or CD16<sup>158F</sup>-CR T cells

483 with or without mAbs. The figure shows cumulative data, with mean  $\pm$ SD values, of tumor  
484 cell viability obtained from 3 different donors at an E:T ratio of 5:1. Asterisks indicate: \* =  
485  $p < 0.05$  and \*\*\* =  $p < 0.001$ .

486 **FIGURE 5.**

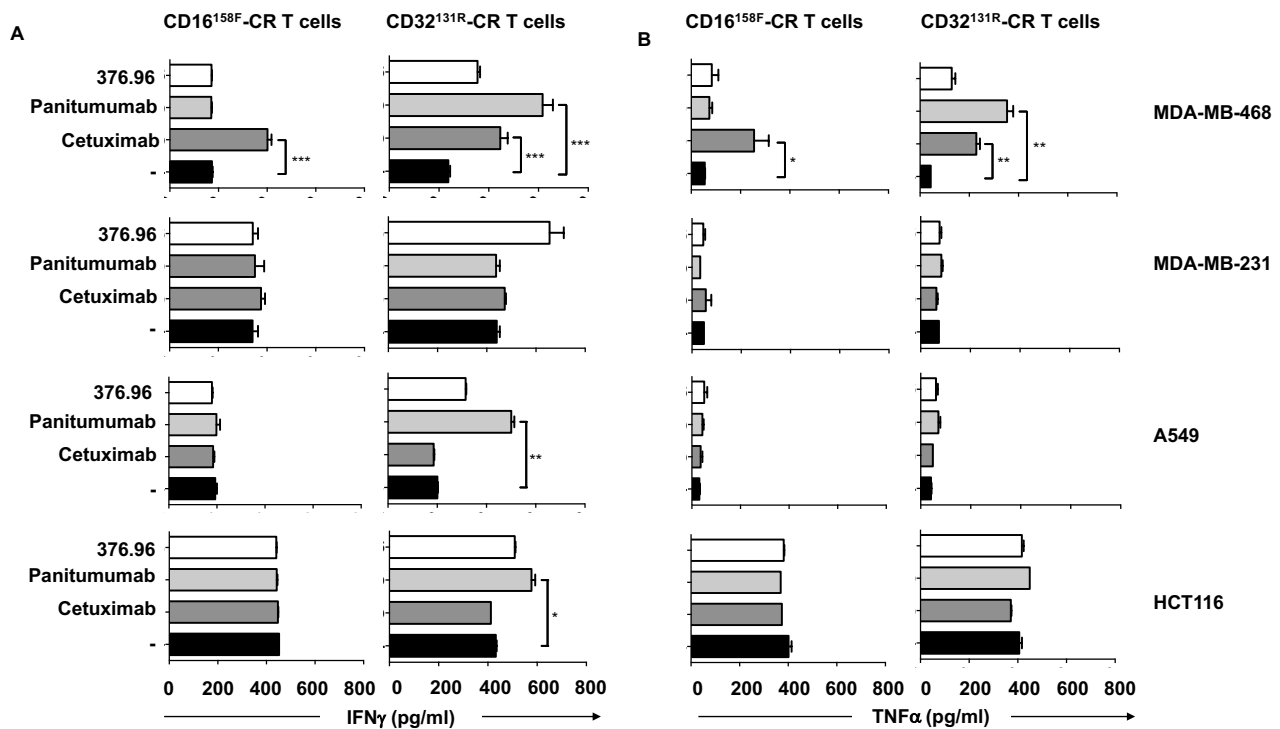

487

488 **Figure 5. CD32<sup>131R</sup>-CR T cells secrete IFN $\gamma$  and TNF $\alpha$  more efficiently than CD16<sup>158F</sup>-**  
489 **CR T cells following their conjugation with MDA-MB-468 cells by anti-EGFR mAbs.**

490 Following a 48h culture, at 37°C, of EGFR<sup>+</sup> and B7-H3<sup>+</sup> tumor target cells with CD16<sup>158F</sup>-  
491 CR T cells or CD32<sup>131R</sup>-CR T cells, in the presence or absence of the indicated mAbs,  
492 supernatants were harvested. The release of IFN $\gamma$  (left) and TNF $\alpha$  (right) was measured in  
493 the culture supernatants by specific ELISA. The figure shows cumulative data, with mean  
494  $\pm$ SD values, of tumor cell viability from 3 different experiments performed at a 5:1 E:T  
495 ratio. Asterisks indicate: \* =  $p < 0.05$ , \*\* =  $p < 0.01$ , and \*\*\* =  $p < 0.001$ .

496



497 **FIGURE 6.**

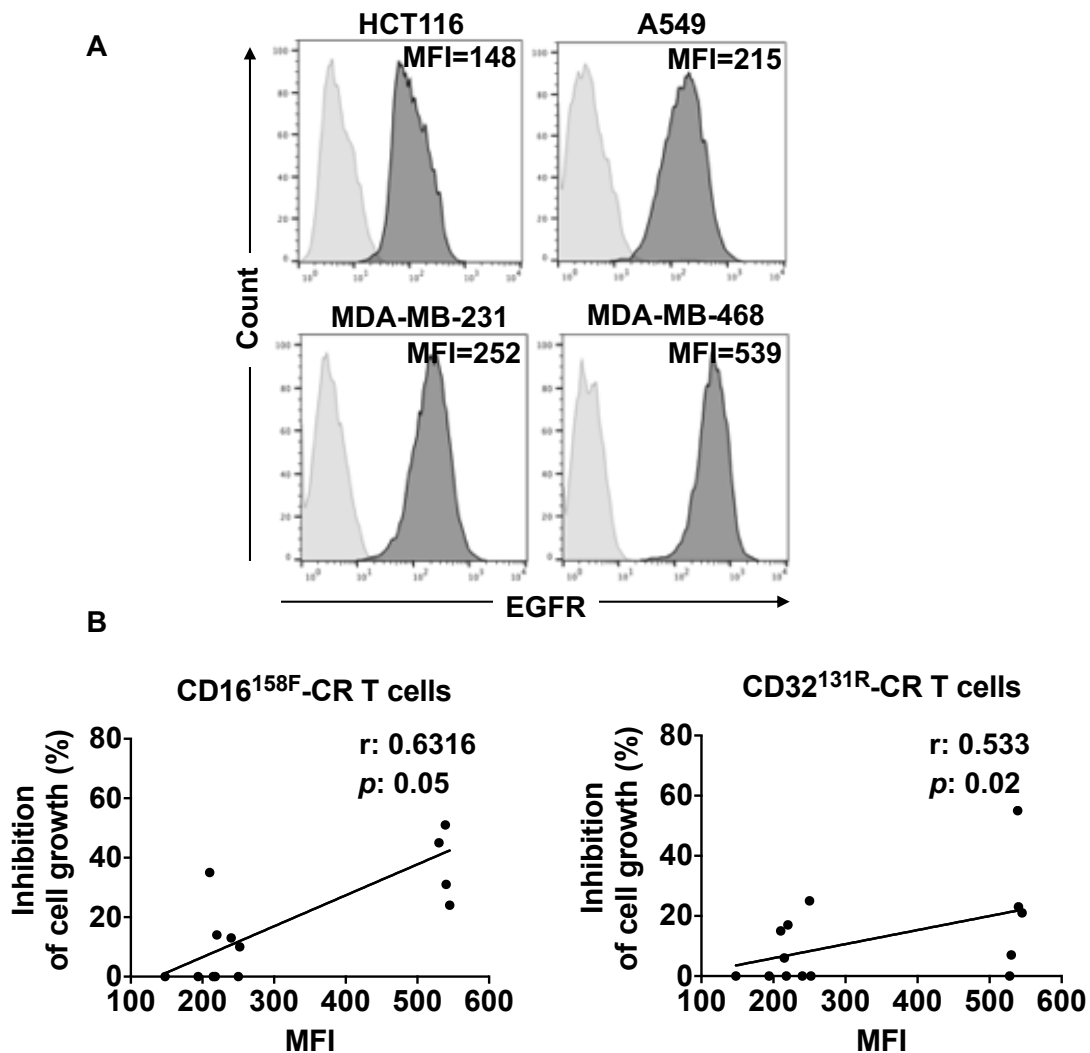

498

499 **Figure 6. *In vitro* elimination of EGFR<sup>+</sup> ECCs by CD32<sup>131R</sup>-CR and CD16<sup>158F</sup>-CR T**  
500 **cells is associated with EGFR overexpression.** A) EGFR expression levels in tumor cell  
501 lines as assessed by flow cytometry. Cells were incubated with 3µg/ml of purified anti-  
502 EGFR antibody, washed and then stained with a FITC-conjugated anti-mouse IgG (gray  
503 filled histograms). Cells incubated with FITC-conjugated anti-mouse IgG were used as a  
504 negative control (light gray filled histograms). MFI is indicated for each cell line. B)  
505 Spearman's correlation between EGFR expression levels (MFI) in HCT116, A549, MDA-  
506 MB-231, and MDA-MB-468 cell lines and the ECC elimination by CD16<sup>158F</sup>-CR T cells (left  
507 panel) and CD32<sup>131R</sup>-CR T cells (right panel) in combination with cetuximab. A regression

508 line is reported in black. Spearman's rank correlation coefficient ( $r$ ) was 0.6316 for  
509 CD16<sup>158F</sup>-CR and 0.533 for CD32<sup>131R</sup>-CR.

## 510 REFERENCES

- 511 1. Bakema JE, van Egmond M. Fc Receptor-Dependent Mechanisms of Monoclonal  
512 Antibody Therapy of Cancer. In: Current topics in microbiology and immunology.  
513 Springer, Cham, 2014. 373–92.
- 514 2. Bruhns P, Iannascoli B, England P, Mancardi DA, Fernandez N, Jorieux S, Daë Ron  
515 M. Specificity and affinity of human Fc gamma receptors and their polymorphic  
516 variants for human IgG subclasses. *Blood* 2009;113:3716–25.
- 517 3. Rocha-Lima CM, Soares HP, Raez LE, Singal R. EGFR Targeting of Solid Tumors.  
518 *Cancer Control* 2007;14:295–304.
- 519 4. Schneider-Merck T, van Bueren JJL, Berger S, Rossen K, van Berkel PHC, Derer S,  
520 Beyer T, Lohse S, Bleeker WK, Peipp M, Parren PWHI, van de Winkel JGJ, et al.  
521 Human IgG2 Antibodies against Epidermal Growth Factor Receptor Effectively  
522 Trigger Antibody-Dependent Cellular Cytotoxicity but, in Contrast to IgG1, Only by  
523 Cells of Myeloid Lineage. *J Immunol* 2010;184:512–20.
- 524 5. Clynes R, Takechi Y, Moroi Y, Houghton A, Ravetch J V. Fc receptors are required  
525 in passive and active immunity to melanoma. *Proc Natl Acad Sci USA* 1998;95:652–  
526 6.
- 527 6. Caratelli S, Sconocchia T, Arriga R, Coppola A, Lanzilli G, Lauro D, Venditti A, Del  
528 Principe MI, Buccisano F, Maurillo L, Ferrone S, Sconocchia G. FCγ chimeric  
529 receptor-engineered T cells: Methodology, advantages, limitations, and clinical  
530 relevance. *Front Immunol* 2017;8:1–8.

- 531 7. Kudo K, Imai C, Lorenzini P, Kamiya T, Kono K, Davidoff AM, Chng WJ, Campana  
532 D. T Lymphocytes Expressing a CD16 Signaling Receptor Exert Antibody-  
533 Dependent Cancer Cell Killing. *Cancer Res* 2014;74:93–103.
- 534 8. D'aloia MM, Caratelli S, Palumbo C, Battella S, Arriga R, Lauro D, Palmieri G,  
535 Sconocchia G, Alimandi M. T lymphocytes engineered to express a CD16-chimeric  
536 antigen receptor redirect T-cell immune responses against immunoglobulin G-  
537 opsonized target cells. *Cytotherapy* 2016;18:278–90.
- 538 9. Clemenceau B, Congy-Jolivet N, Gallot G, Vivien R, Gaschet J, Thibault G, Vie H.  
539 Antibody-dependent cellular cytotoxicity (ADCC) is mediated by genetically modified  
540 antigen-specific human T lymphocytes. *Blood* 2006;107:4669–77.
- 541 10. Ochi F, Fujiwara H, Tanimoto K, Asai H, Miyazaki Y, Okamoto S, Mineno J,  
542 Kuzushima K, Shiku H, Barrett J, Ishii E, Yasukawa M. Gene-Modified Human  $\alpha/\beta$ -T  
543 Cells Expressing a Chimeric CD16-CD3 $\zeta$  Receptor as Adoptively Transferable  
544 Effector Cells for Anticancer Monoclonal Antibody Therapy. *Cancer Immunol Res*  
545 2014;2:249–62.
- 546 11. Imai K, Wilson BS, Bigotti A, Natali PG, Ferrone S. A 94,000-dalton glycoprotein  
547 expressed by human melanoma and carcinoma cells. *J Natl Cancer Inst*  
548 1982;68:761–9.
- 549 12. Xu H, Yu Y, Marciniak D, Rishi AK, Sarkar FH, Kucuk O, Majumdar APN. Epidermal  
550 growth factor receptor (EGFR)-related protein inhibits multiple members of the  
551 EGFR family in colon and breast cancer cells. *Mol Cancer Ther* 2005;4:435–42.
- 552 13. Veluchamy JP, Spanholtz J, Tordoir M, Thijssen VL, Heideman DAM, Verheul HMW,  
553 De Gruijl TD, Van Der Vliet HJ. Combination of NK Cells and Cetuximab to Enhance  
554 Anti-Tumor Responses in RAS Mutant Metastatic Colorectal Cancer. *PLoS One*

- 555 2016;1–16.
- 556 14. Lande R, Urbani F, Di Carlo B, Sconocchia G, Deaglio S, Funaro A, Malavasi F,  
557 Ausiello CM. CD38 ligation plays a direct role in the induction of IL-1b, IL-6, and IL-  
558 10 secretion in resting human monocytes. *Cell Immunol* 2002;220:30–8.
- 559 15. Sconocchia G, Campagnano L, Adorno D, Iacona A, Cococchetta NY, Boffo V,  
560 Amadori S, Casciani CU. CD44 ligation on peripheral blood polymorphonuclear cells  
561 induces interleukin-6 production. *Blood* 2001;97:3621–7.
- 562 16. Pericle F, Sconocchia G, Titus JA, Segal DM. CD44 is a cytotoxic triggering  
563 molecule on human polymorphonuclear cells. *J Immunol* 1996;157:4657–63.
- 564 17. Shaw GM, Levy PC, Lobuglio AF. Human Monocyte Antibody-Dependent Cell-  
565 Mediated Cytotoxicity to Tumor Cells. *J Clin Invest* 1978;62:1172–80.
- 566 18. Stockmeyer B, Beyer T, Neuhuber W, Repp R, Kalden JR, Valerius T, Herrmann M.  
567 Polymorphonuclear Granulocytes Induce Antibody-Dependent Apoptosis in Human  
568 Breast Cancer Cells. *J Immunol* 2003;171:5124–9.
- 569 19. Cheeseman HM, Olejniczak NJ, Rogers PM, Evans AB, King DFL, Ziprin P, Liao H-  
570 X, Haynes BF, Shattock RJ, Silvestri G. Broadly Neutralizing Antibodies Display  
571 Potential for Prevention of HIV-1 Infection of Mucosal Tissue Superior to That of  
572 Nonneutralizing Antibodies. *J Virol* 2017;91:1762–78.
- 573 20. Rajput A, Dominguez San Martin I, Rose R, Beko A, LeVea C, Sharratt E,  
574 Mazurchuk R, Hoffman RM, Brattain MG, Wang J. Characterization of HCT116  
575 Human Colon Cancer Cells in an Orthotopic Model. *J Surg Res* 2008;147:276–81.
- 576 21. Hollestelle A, Elstrodt F, Nagel JHA, Kallemeijn WW, Schutte M.  
577 Phosphatidylinositol-3-OH Kinase or RAS Pathway Mutations in Human Breast

- 578 Cancer Cell Lines. *Mol Cancer Res* 2007;5:195–201.
- 579 22. Armstrong DK, Kaufmann SH, Ottaviano YL, Furuya Y, Buckley JA, Isaacs JT,  
580 Davidson NE. Epidermal Growth Factor-mediated Apoptosis of MDA-MB-468  
581 Human Breast Cancer Cells. *Cancer Res* 1994;54:5280–3.
- 582 23. Derer S, Berger S, Schlaeth M, Schneider-Merck T, Klausz K, Lohse S, Overdijk  
583 MB, Dechant M, Kellner C, Nagelmeier I, Scheel AH, Lammerts van Bueren JJ, et al.  
584 Oncogenic KRAS impairs EGFR antibodies' efficiency by C/EBP $\beta$ -dependent  
585 suppression of EGFR expression. *Neoplasia* 2012;14:190–205.
- 586 24. Trivedi S, Srivastava RM, Concha-Benavente F, Ferrone S, Garcia-Bates TM, Li J,  
587 Ferris RL. Anti-EGFR Targeted Monoclonal Antibody Isotype Influences Antitumor  
588 Cellular Immunity in Head and Neck Cancer Patients. *Clin Cancer Res*  
589 2016;22:5229–37.
- 590 25. Sconocchia G, Keyvanfar K, Ouriaghli F El, Grube M, Rezvani K, Fujiwara H, Mccoy  
591 JP, Hensel N, Barrett AJ. Phenotype and function of a CD56 + peripheral blood  
592 monocyte. *Leukemia* 2005;19:69–76.
- 593 26. Nimmerjahn F, Ravetch J V. Fc gamma Receptors: Old Friends and New Family  
594 Members. *Immunity* 2006;24:19–28.
- 595
